# Supplementary material
Source: publisher figshare collection journal article supplement (https://acs.figshare.com/ndownloader/files/3777214)
Supplement: Supplementary file 1 [file 3777214]

**Supplemental Table 3: Enriched Biological Process Terms from GO Annotation of proteins with altered expression from platelet releasate treated THP-1 cells.**

| Stimuli: Thrombin |                                |                |          |                                                                                                  |
|-------------------|--------------------------------|----------------|----------|--------------------------------------------------------------------------------------------------|
| GO Number         | GO Term                        | Protein Number | p-Value  | Proteins (Uniprot ID)                                                                            |
| GO:0016052        | carbohydrate catabolic process | 5              | 5.45E-04 | ALDOC_HUMAN, G6PE_HUMAN, CH3L1_HUMAN, ALDOA_HUMAN, HEXB_HUMAN                                    |
| Stimuli: LPA      |                                |                |          |                                                                                                  |
| GO Number         | GO Term                        | Protein Number | p-Value  | Proteins (Uniprot ID)                                                                            |
| GO:0007155        | cell adhesion                  | 8              | 5.53E-04 | ITA5_HUMAN, ANGT_HUMAN, PECA1_HUMAN, ITA2B_HUMAN, GPNMB_HUMAN, ITB3_HUMAN, RET_HUMAN, ITA4_HUMAN |
| GO:0022610        | biological adhesion            | 8              | 5.58E-04 | ITA5_HUMAN, ANGT_HUMAN, PECA1_HUMAN, ITA2B_HUMAN, GPNMB_HUMAN, ITB3_HUMAN, RET_HUMAN, ITA4_HUMAN |
| GO:0009611        | response to wounding           | 6              | 4.93E-03 | TRFE_HUMAN, ITA5_HUMAN, TFR1_HUMAN, CATB_HUMAN, CO3_HUMAN, ITB3_HUMAN                            |

**Supplemental Figure 1: Exemplified histograms of flow cytometry analysis for the validation of Integrin  $\alpha 5$ ,  $\beta 1$ , PECAM-1 and PSGL-1.** THP-1 cells were treated with media as control, or thrombin- or LPA- induced platelet releasate (Thr-PR or LPA-PR) for 24h. Antibodies of integrin  $\alpha 5$ ,  $\beta 1$ , PSGL-1 or PECAM-1 or their corresponding isotype control were added. THP-1 cells were gated based on size and granularity. Histograms of each protein in their corresponding channel in one repeat of the surface expression level measurements are shown with mean fluorescent intensity (MFI) given. Relative expression level for each protein was calculated as follows: Ratio = [MFI(treatment) – MFI(isotype)] / [MFI(media) – MFI(isotype)].

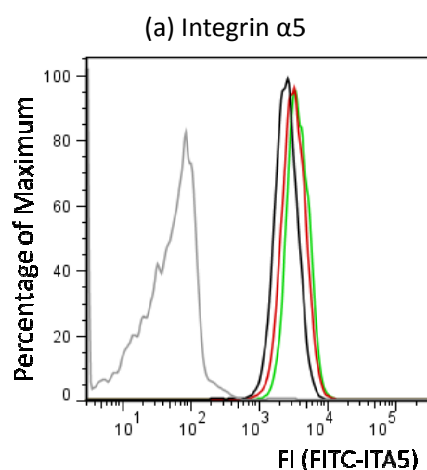

| Sample  | MFI  |
|---------|------|
| Isotype | 77.6 |
| Media   | 2105 |
| THR-PR  | 2711 |
| LPA-PR  | 2592 |

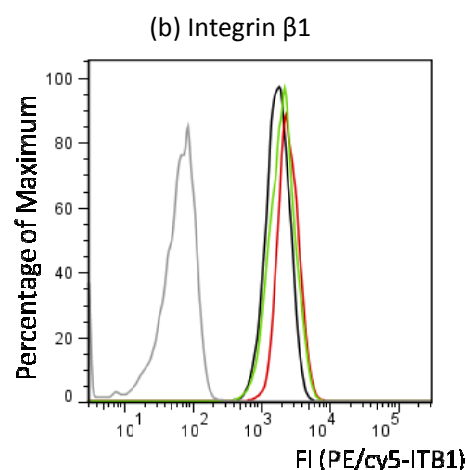

| Sample  | MFI  |
|---------|------|
| Isotype | 53.4 |
| Media   | 1281 |
| THR-PR  | 1746 |
| LPA-PR  | 1702 |

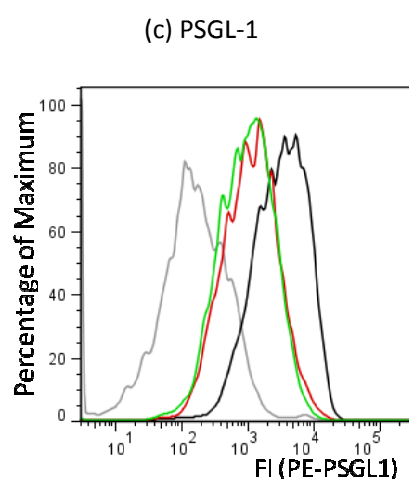

| Sample  | MFI  |
|---------|------|
| Isotype | 242  |
| Media   | 5395 |
| THR-PR  | 2402 |
| LPA-PR  | 2293 |

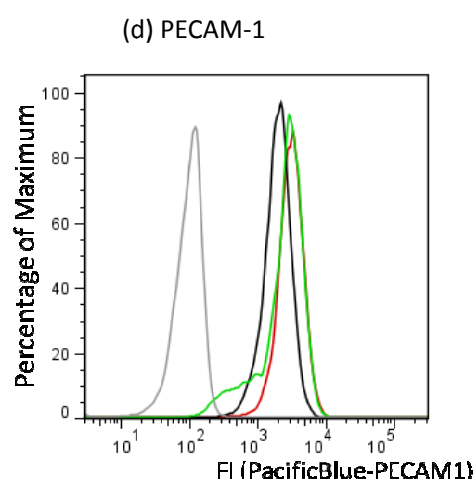

| Sample  | MFI  |
|---------|------|
| Isotype | 110  |
| Media   | 1985 |
| THR-PR  | 3132 |
| LPA-PR  | 2879 |

**Supplemental Figure 2: Exemplified histograms of flow cytometry analysis for the effect of P-selectin blocking antibody on platelet releasate induced THP-1 cell activation.** THP-1 cells, pre-treated with 2.5 ug/mL anti-P-selectin blocking antibody for 30min or not, were treated with media as control, or LPA- induced platelet releasate (LPA-PR) for 24h. Antibodies of CD41, integrin  $\alpha 5$  or their corresponding isotype control were added. THP-1 cells were gated based on size and granularity. Histograms of each protein in their corresponding channel in one repeat of the surface expression level measurements are shown with mean fluorescent intensity (MFI) given. Relative expression level for integrin  $\alpha 5$  was calculated as follows: Ratio = [MFI(treatment) – MFI(isotype)] / [MFI(media) – MFI(isotype)].

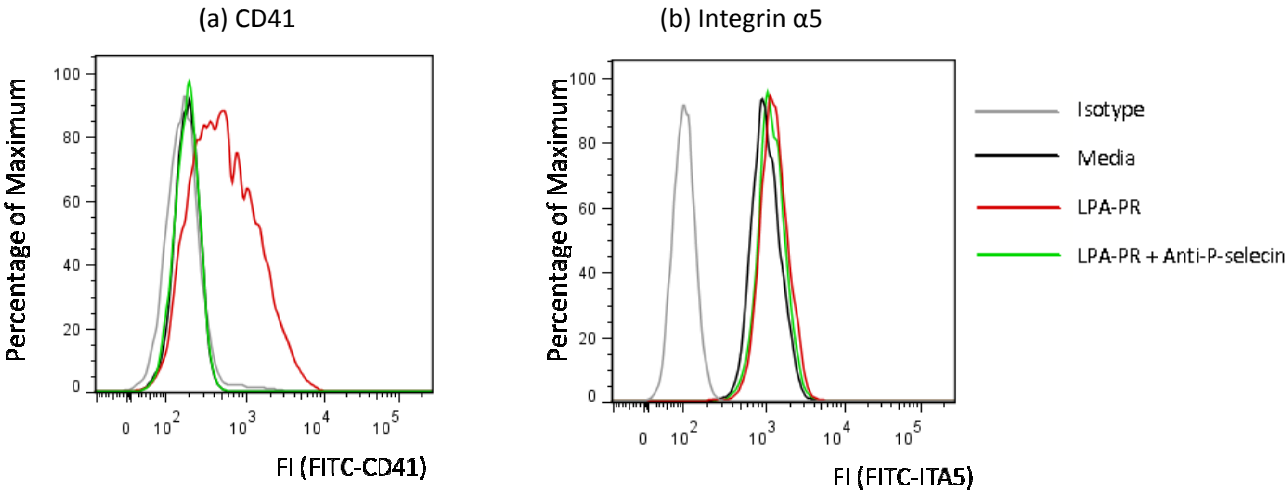

| Sample                 | MFI  |
|------------------------|------|
| Isotype                | 69.3 |
| Media                  | 1085 |
| LPA-PR                 | 1492 |
| LPA-PR + ab-P-selectin | 1477 |

**Supplemental Figure 3: Exemplified histograms of flow cytometry analysis for the validation of protein expression changes on CD14+ primary monocytes.** CD14+ primary monocytes were treated with media as control, or thrombin- or LPA- induced platelet releasate (Thr-PR or LPA-PR) for 24h. Antibodies of integrin  $\alpha 5$ ,  $\beta 1$ , PSGL-1 or PECAM-1 or their corresponding isotype control were added into treated or freshly isolated cells. Cells were gated based on size and granularity. Histograms of each protein in their corresponding channel in one repeat of the surface expression measurements are shown with mean fluorescent intensity (MFI) given. Relative expression level for each protein was calculated as follows: Ratio = [MFI(treatment or media at 24h) – MFI(isotype)] / [MFI(0h) – MFI(isotype)].

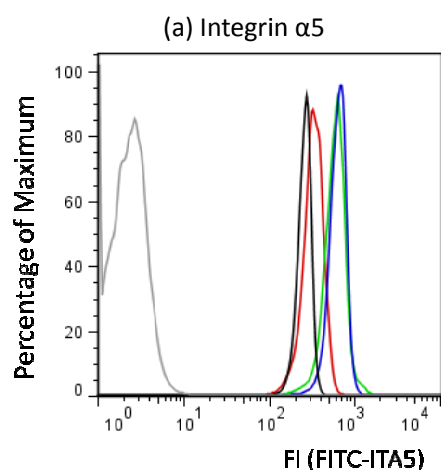

| Sample     | MFI  |
|------------|------|
| Isotype    | 2.31 |
| 0h         | 3020 |
| Media 24h  | 4140 |
| THR-PR 24h | 8703 |
| LPA-PR 24h | 9253 |

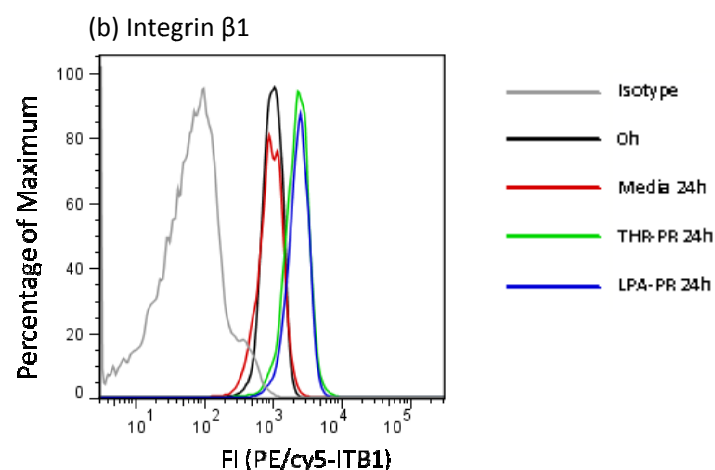

| Sample     | MFI  |
|------------|------|
| Isotype    | 49.4 |
| 0h         | 988  |
| Media 24h  | 953  |
| THR-PR 24h | 2323 |
| LPA-PR 24h | 2368 |

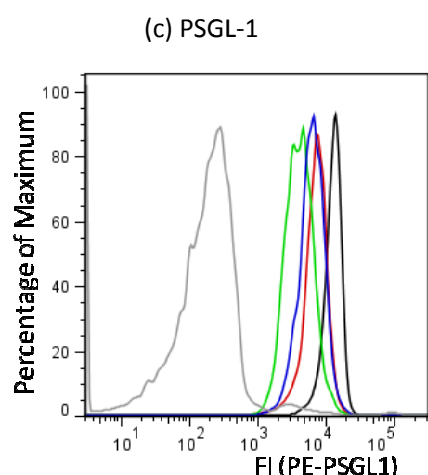

| Sample     | MFI   |
|------------|-------|
| Isotype    | 594   |
| 0h         | 12600 |
| Media 24h  | 7240  |
| THR-PR 24h | 4412  |
| LPA-PR 24h | 6573  |

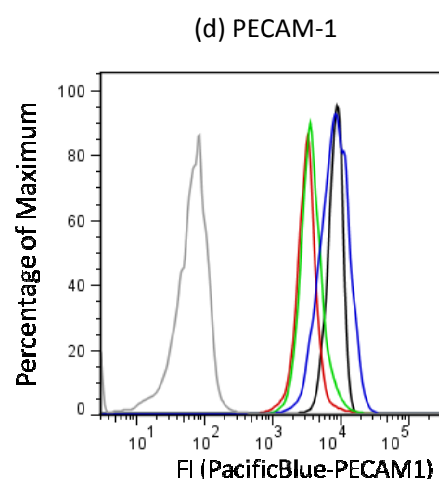

| Sample     | MFI  |
|------------|------|
| Isotype    | 77.3 |
| 0h         | 8174 |
| Media 24h  | 3324 |
| THR-PR 24h | 4027 |
| LPA-PR 24h | 8625 |
